# Supplementary material for: Synthesis, structural studies, kinetic stability, and oxidation catalysis of the late first row transition metal complexes of 4,10-dimethyl-1,4,7,10-tetraazabicyclo[6.5.2]pentadecane
Source: Royal Society of Chemistry journal article supplement (doi:10.1039/c5dt00742a), 2015-01-01
Supplement: c5dt00742a1.pdf [file c5dt00742a1.pdf]

## Supplementary Information

### Synthesis, structural studies, kinetic stability, and oxidation catalysis of the late first row transition metal complexes of 4,10-dimethyl-1,4,7,10-tetraazabicyclo[6.5.2]pentadecane

Dallas L. Matz,<sup>a</sup> Donald G. Jones,<sup>a</sup> Kimberly D. Roewe,<sup>a</sup> Michael-Joseph Gorbet,<sup>a</sup> Zhan Zhang,<sup>b</sup> Zhuqi Chen,<sup>b</sup> Timothy J. Prior,<sup>c</sup> Stephen J. Archibald,<sup>c</sup> Guochuan Yin,<sup>b\*</sup> and Timothy J. Hubin<sup>a\*</sup>

#### Table of Contents

|                                                                                            |    |
|--------------------------------------------------------------------------------------------|----|
| Discussion of Hydrogen Bonding in Crystal Structures                                       | S2 |
| Table S1 Hydrogen bonds in [Zn(Me <sub>2</sub> B13N4)OAc(OH <sub>2</sub> )]PF <sub>6</sub> | S2 |

## Discussion of Hydrogen Bonding in Crystal Structures:

[Mn(Me<sub>2</sub>B13N4)Cl<sub>2</sub>]: The complexes are packed in accordance with the P2<sub>1</sub>/c symmetry in such a way that there are a large number of C–H···Cl interactions present. One way to describe the structure is in terms of puckered sheets of complexes in the *xz* plane held together by C–H···Cl interactions, that are then further arranged into a 3-D array by AAA stacking along *b*.

[Mn(Me<sub>2</sub>B13N4)Cl<sub>2</sub>]PF<sub>6</sub> and [Co(Me<sub>2</sub>B13N4)Cl<sub>2</sub>]PF<sub>6</sub>: In the solid state, the complexes are ordered in sheets in the *yz* plane by C–H···Cl interactions. These are arranged in an AAA sequence at a separation of *a*. Between the sheets are found layers of PF<sub>6</sub><sup>−</sup> anions which form C–H···F interactions to each layer.

[Co(Me<sub>2</sub>B13N4)Cl<sub>2</sub>]PF<sub>6</sub> · MeCN: The arrangement is layered; sheets of PF<sub>6</sub><sup>−</sup> anions and double sheets of [Co(Me<sub>2</sub>B13N4)Cl<sub>2</sub>]<sup>+</sup>/MeCN extend in the *xz* plane. These sheets are stacked parallel to the crystallographic *b*-axis in an ABA'B' fashion. Within the double sheets there are C–H···Cl interactions C–H···F interactions exist between the sheets.

[Cu(Me<sub>2</sub>B13N4)Cl]Cl · 2H<sub>2</sub>O: The crystal packing within the compound is largely unremarkable except for the location of the water. The two water molecules are engaged in hydrogen bonding to chloride, to each other and to a pair of symmetry-related counterparts. This leads to the formation of centrosymmetric, hydrogen-bonded tetramers of water which are aligned in columns parallel to the *a*-axis.

[Zn(Me<sub>2</sub>B13N4)Cl(OH<sub>2</sub>)<sub>2</sub>][ZnCl<sub>4</sub>] · CH<sub>3</sub>CN: There are a large number of C–H···Cl contacts and C–H···N≡CMe contacts within the structure. The hydrogen-bonded dimers form into double layers that extend in the *xy* plane. Between these lie layers of [ZnCl<sub>4</sub>]<sup>2−</sup> and acetonitrile. The extensive collection of intermolecular interactions helps to bind these layers into an extended 3-D array.

[Zn(Me<sub>2</sub>B13N4)OAc(OH<sub>2</sub>)]PF<sub>6</sub>: Formally this trimer can be described as R<sub>3</sub><sub>6</sub>(12) using Graph Set notation [1] and it is formed by the O3···H1c hydrogen bond and an interaction between O1–H1D···O3<sup>*i*</sup> (*i* = 1−*x*+*y*, 1−*x*, *z*) with O···O distance 2.705(6) Å. These trimers are arranged in stacks parallel to the *c*-direction. Between these lie the PF<sub>6</sub><sup>−</sup> anions, forming short contacts to the macrocycle indicative of C–H···F interactions. Full details of intermolecular interactions are given in **Table S1**.

| Hydrogen bond                                            | d(D–H)<br>/ Å | d(H···A)<br>/ Å | d(D···A)<br>/ Å | ∠(D–H···A)<br>/ ° |
|----------------------------------------------------------|---------------|-----------------|-----------------|-------------------|
| C3–H3A···F2 <sub><i>i</i></sub>                          | 0.99          | 2.61            | 3.418(9)        | 138.9             |
| C7–H7B···O2                                              | 0.99          | 2.54            | 3.101(7)        | 115.7             |
| C8–H8B···F3 <sub><i>ii</i></sub>                         | 0.99          | 2.55            | 3.490(10)       | 159               |
| C12–H12A···O1                                            | 0.98          | 2.55            | 3.127(9)        | 117.5             |
| C13–H13B···F2-<br><sub><i>iii</i></sub>                  | 0.98          | 2.37            | 3.344(9)        | 172.7             |
| C13–H13C···O1                                            | 0.98          | 2.63            | 3.118(9)        | 111.1             |
| C15–H15C···F4 <sub><i>i</i></sub><br><sub><i>v</i></sub> | 0.98          | 2.81            | 3.421(9)        | 121               |
| O1–H1C···O3                                              | 0.86(5)       | 1.85(5)         | 2.669(6)        | 160(8)            |
| O1–H1D···O3 <sub><i>v</i></sub>                          | 0.91(5)       | 1.82(5)         | 2.705(6)        | 166(8)            |

[1] J. Bernstein, R. E. Davis, L. Shimoni and N.-L. Chang, *Angew. Chem. Int. Ed. Engl.*, vol. 34, pp. 1555-1573, 1995.
